# Supplementary material
Source: PubMed Central journal article supplement (PMC3210473)

## Supplementary Information

### A New Fluorescence Complementation Biosensor for Detection of Estrogenic Compounds

Michael J. McLachlan, John A. Katzenellenbogen, Huimin Zhao

**Table S1.** Primers used in this work. Restriction enzyme sites are shown in italics.

| Primer                 | Sequence                                                     |
|------------------------|--------------------------------------------------------------|
| mVenus-Asmbl F1        | AACGTCTATATCACCGCCGACAAGCAGAAGAACGGCATCAAGGCCAACTTCAAGATCCGC |
| mVenus-Asmbl R2        | GGTAGTGGTCGGCGAGCTGCACGCCGCCGTCCTCGATGTTGTGGCGGATCTTGAAGTTGG |
| mVenus-Asmbl F3        | TCGCCGACCACTACCAGCAGAACACCCCCATCGGCGACGGCCCCGTGCTGTGCCCGACA  |
| mVenus-Asmbl R4        | CTTTGCTCAGCTTGGACTGGTAGCTCAGGTAGTGGTTGTCGGGCAGCAGCAC         |
| mVenus F64L-For        | AAGCTGCCCGTGCCCTGGCCACCCTCGTGACCACCCTGGGCTAC                 |
| mVenus F46L-Rev        | CCAGGGCACGGGCAGCTTGCCGGTGGTGCAGATCAGCTTCAGGGT                |
| mVenus-For-KpnI        | AAAAAAGGTACCATGGTGAGCAAGGGCGAGGAG                            |
| mVenus-Rev-BamHI       | TTTTTTGGATCCTTACTTGTACAGCTCGTCCATGCCG                        |
| mVn154-Stop-Rev-BamHI  | TTTTTTGGATCCTCAGGCCGGTGATATAGACGTTGTGGCT                     |
| mVc155-For-KpnI        | AAAAAAGGTACCATGGCCGACAAGCAGAAGAAC                            |
| mVenus154noStopRevSalI | AAAAAAGTCGACGGCGGTGATATAGACGTTGTGGCT                         |
| mVenus155-SalI-For     | AAAAAAGTCGACATGGACAAGCAGAAGAACGGCATCAAGGCCAA                 |
| ER281-For-SalI         | AAAAAAGTCGACATGGGGTCTGCTGGAGACATGAGAGCT                      |
| ER312-For-SalI         | AAAAAAGTCGACGCCGACCAGATGGTCAAGTGC                            |
| ER532-noStop-Rev-SalI  | AAAAAAGTCGACGTTCTTGCACTTCATGCTGTACAGATG                      |
| ER549-noStop-Rev-SalI  | AAAAAAGTCGACTAGGCCGGTGGGCGTCCAGCAT                           |
| ER595-noStop-Rev-SalI  | AAAAAAGTCGACGACTGTGGCAGGAAACCCTCT                            |

**Fig. S1.** Fluorescence of mVenus and its N and C terminal halves in HeLa cells. Plasmid was lipofected into HeLa cells (along with non-fluorescent  $\beta$ -galactosidase plasmid to bring the total DNA to 800 ng) in 24-well plates. Samples from left to right are  $\beta$ -galactosidase, 100 ng Vn, 100 ng Vc, 100 ng mVenus, 10 ng of Vn and Vc, 100 ng of Vn and Vc, 400 ng of Vn and Vc.

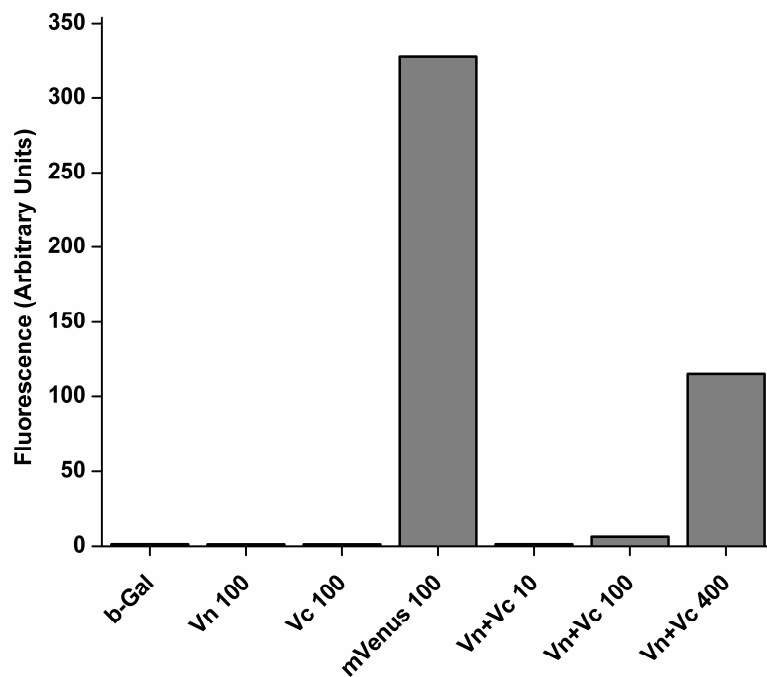

Supplement: NIHMS312147-supplement-supplement_1.pdf [file NIHMS312147-supplement-supplement_1.pdf]
